# Supplementary material for: IL-2 Therapy Diminishes Renal Inflammation and the Activity of Kidney-Infiltrating CD4+ T Cells in Murine Lupus Nephritis
Source: PubMed Central journal article supplement (PMC6829607; doi:10.3390/cells8101234), 2019-10-11
Supplement: cells-08-01234-s001.pdf [file cells-08-01234-s001.pdf]

## Supplementary Figures

Rose et al. IL-2 therapy diminishes renal inflammation and the activity of kidney-infiltrating CD4+ T cells in murine lupus nephritis

Figure S1

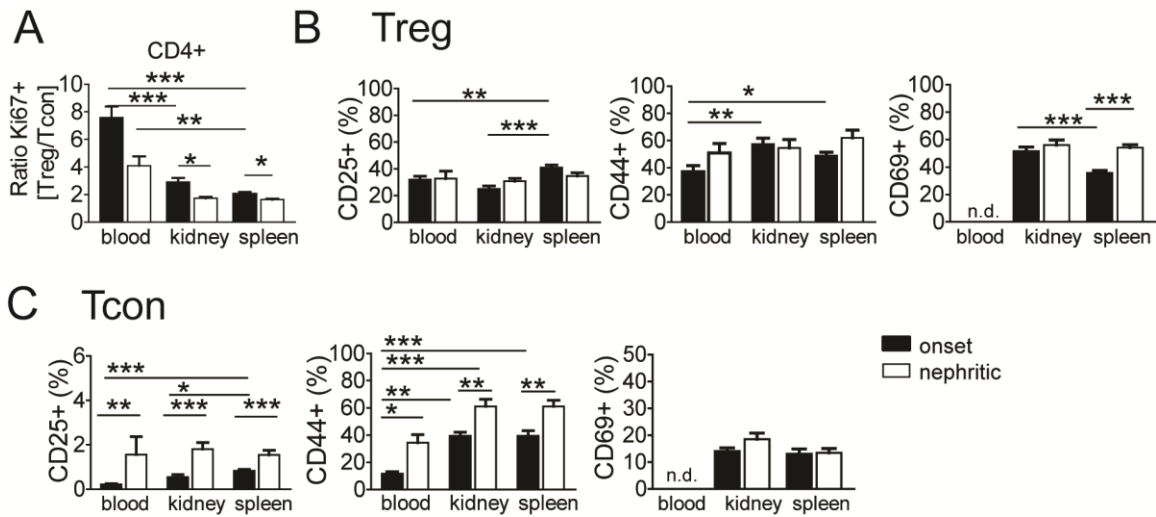

**Figure S1.** Phenotypic changes of Treg and Tcon in different organs during progression of LN. Cells from peripheral blood, kidneys and spleens of (NZB × NZW) F1 mice at the disease onset (onset) and with established nephritis (nephritic) were analyzed by flow cytometry. (A) The calculated ratio between percentages of Ki67+ Treg and of Ki67+ Tcon is shown. (B,C) The percentages of CD25+, CD44hi, CD69+ cells among CD4+FoxP3+ Treg (B) and among CD4+FoxP3- Tcon (C) is shown. Mice were grouped according to their proteinuria score into onset (PU Score ≤3) and nephritic (PU Score >3). Data are the summary of four to six independent experiments. Horizontal lines indicate the median + SEM of each group. Mann-Whitney U test was used for statistical analyses (\*p≤0.05, \*\*p<0.01, \*\*\*p<0.001).

**Figure S2**

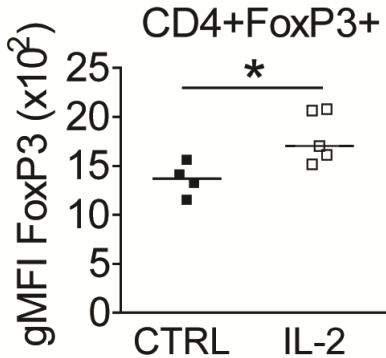

**Figure S2.** Short-term IL-2 treatment increases the expression of FoxP3 in intrarenal Treg. Cells from kidneys of (NZB × NZW) F1 mice with established disease were analyzed by flow cytometry 24 h after a 5-day treatment course with daily injections of rIL-2 and compared with PBS-treated control mice. The geometric mean fluorescence intensity (gMFI) of FoxP3 within intrarenal CD4+FoxP3+ cells is shown. Data are from one experiment. Filled squares indicate PBS treated control mice (CTRL, n=5) and open squares represent IL-2 treated mice (IL-2, n=4). Horizontal lines indicate the median of each group. Mann-Whitney U test was used for statistical analyses (\*p<0.05).

**Figure S3**

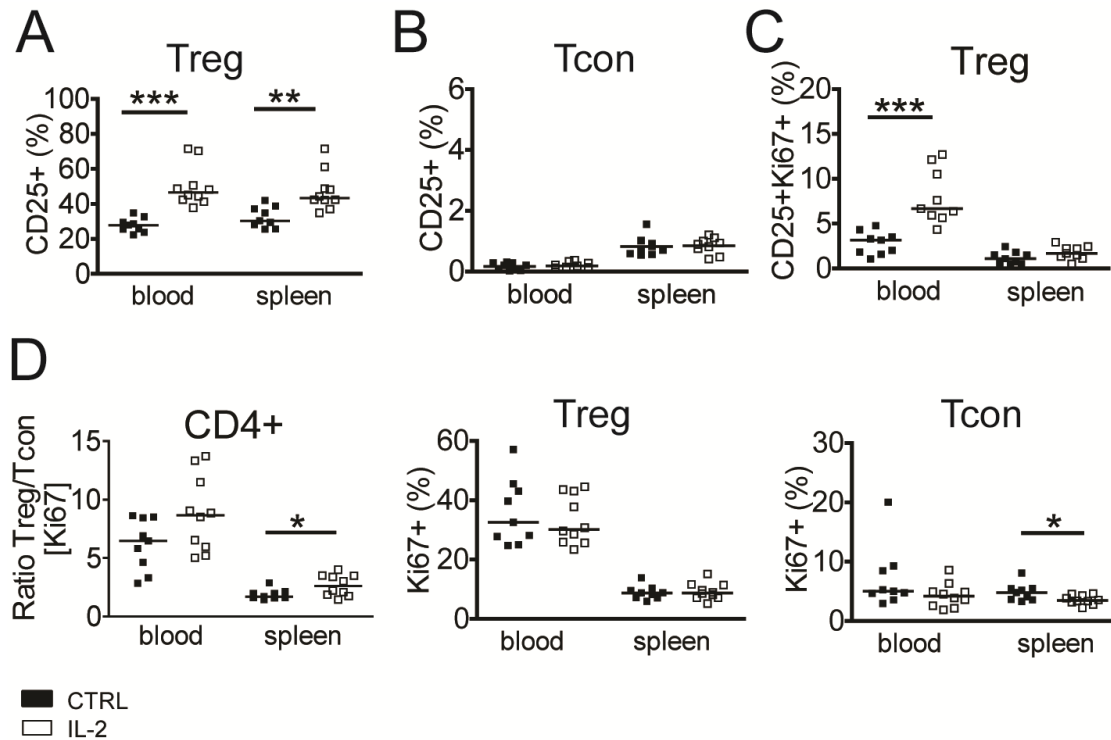

**Figure S3.** Phenotypic changes of Treg and Tcon in spleens and peripheral blood after short-term IL-2 treatment. Cells from spleens and peripheral blood of (NZB × NZW) F1 mice at the disease onset were analyzed by flow cytometry 24h after a 5-day treatment course with daily injections of rIL-2 and compared with PBS-treated control mice. (A-C) Frequencies of CD25+ cells among FoxP3+CD4+ Treg (A), of CD25+ cells among FoxP3-CD4+ Tcon (B) and of CD25+Ki67+ cells among FoxP3+CD4+ Treg (C) are shown. (D) The calculated ratio between percentages of Ki67+ Treg and Ki67+ Tcon and percentages of Ki67+ cells among Treg and Tcon are shown. Filled squares indicate PBS treated control mice (CTRL) and open squares represent IL-2 treated mice (IL-2). Data are the summary from two independent experiments. Horizontal lines indicate the median of each group. Mann-Whitney U test was used for statistical analyses (\*p<0.05, \*\*p<0.01, \*\*\*p<0.001). One outlier in the CD25+Ki67+ Treg subset of the IL-2 group at day 5 (blood and spleen) was identified and removed after using the ROUT test.

**Figure S4**

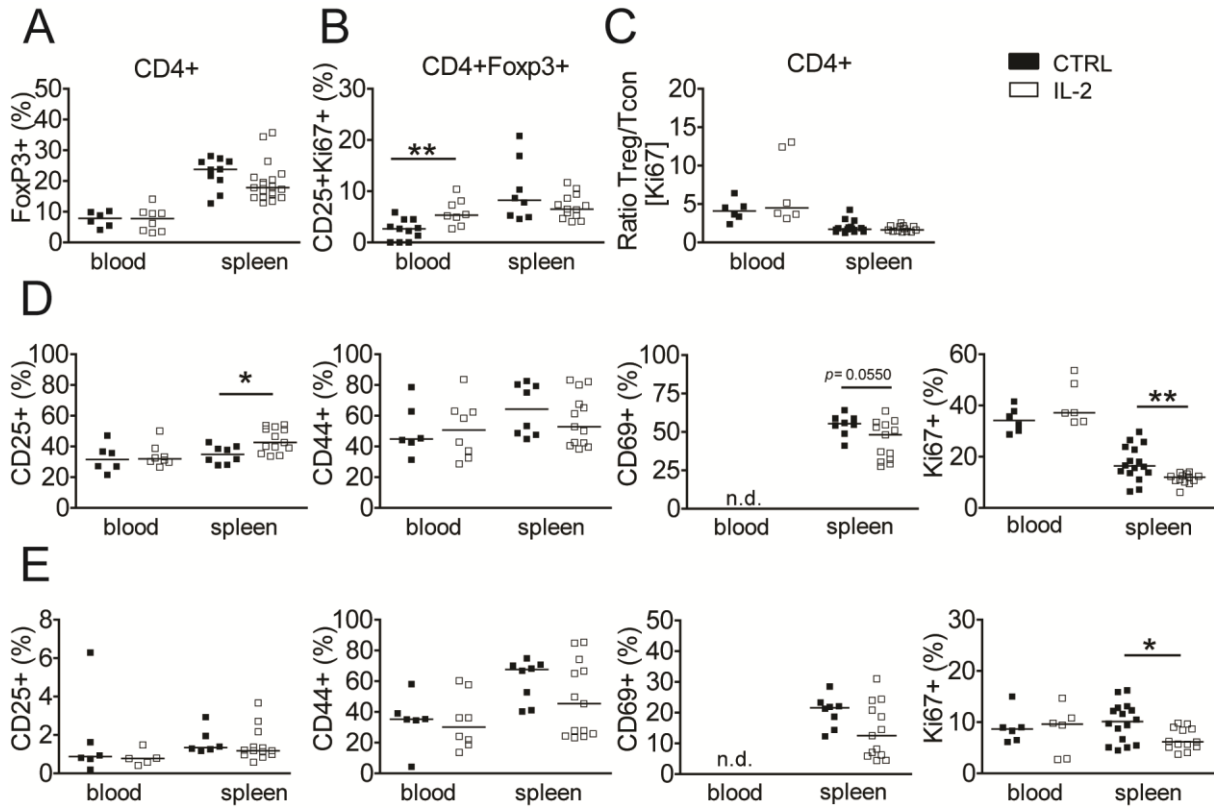

**Figure S4.** Phenotypic changes of Treg and Tcon in spleens and peripheral blood after long-term IL-2 treatment. Cells from spleens and peripheral blood of (NZB × NZW) F1 mice with active nephritis were analyzed by flow cytometry at day 31 after the start of the IL-2 treatment (48h after the last IL-2 injection) (IL-2, white bars) and were compared to PBS-treated control mice (CTRL, black bars). (A-C) Frequencies of FoxP3+ Treg among CD4+ T cells (A), of CD25+Ki67+ cells among CD4+FoxP3+ Treg (B) and the calculated ratio between percentages of Ki67+ Treg and Ki67+ Tcon are shown. (D, E) Frequencies of CD25+, of CD44<sup>hi</sup>, of CD69+ and of Ki67+ cells among CD4+FoxP3+ Treg (D) and among CD4+FoxP3+ Tcon (E) are shown. Filled squares indicate PBS treated control mice (CTRL) and open squares represent IL-2 treated mice (IL-2). Data represent the summary from two independent experiments. Horizontal lines indicate the median of each group. Mann-Whitney U test was used for statistical analyses (\* $p \leq 0.05$ , \*\* $p < 0.01$ ).

**Figure S5**

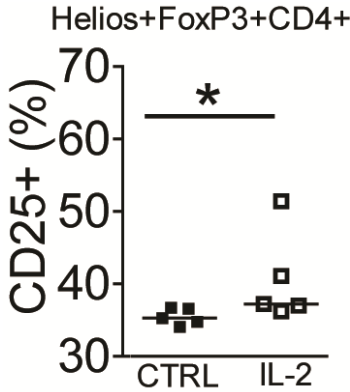

**Figure S5.** Long-term IL-2 treatment increases CD25 expression in Helios+ Treg in the spleen. The frequencies of CD25+ cells among splenic CD4+FoxP3+Helios+ Treg were analyzed by flow cytometry in nephritic (NZB × NZW) F1 mice at day 31 after the start of the IL-2 treatment. Filled squares indicate PBS treated control mice (CTRL, n=5) and open squares represent IL-2 treated mice (IL-2, n=5). Horizontal lines indicate the median of each group. Mann-Whitney U test was used for statistical analyses (\*p<0.05).
